# Supplementary material for: Cell-type-specific responses to associative learning in the primary motor cortex
Source: eLife journal article supplement (doi:10.7554/elife.72549), 2022-02-03
Supplement: supp [file elife-72549-supp-v1.zip]

Archive with 7 entries (7 files):
- elife_poa_e72549_Figure_2_figure_supplement_1.pdf
- elife_poa_e72549_Figure_2_figure_supplement_2.pdf
- elife_poa_e72549_Figure_4_figure_supplement_1.pdf
- elife_poa_e72549_Figure_4_figure_supplement_2.pdf
- elife_poa_e72549_Figure_7_figure_supplement_1.pdf
- elife_poa_e72549_Supplementary_file_1.xlsx
- elife_poa_e72549_Transparent_Reporting_File.docx
