# Supplementary material for: Cell-type-specific responses to associative learning in the primary motor cortex
Source: eLife journal article supplement (doi:10.7554/elife.72549), 2022-02-03
Supplement: supp [file elife-72549-supp-v1.zip › elife_poa_e72549_Supplementary_file_1.xlsx]

## Sheet: Sheet1
Experimental Condition	Cell type	Total ROIs on Day 1	Total Active Cells on Day 1	Total Active Cells Tracked From Day 1 to 7
Paired CS-Reward	PN	211	211	211
		73	73	73
		299	299	299
		184	183	183
		256	255	255
		186	186	186
	PV-IN	102	102	101
		45	43	43
		40	40	40
		65	61	61
		47	34	32
		17	15	15
	VIP-IN	120	113	112
		118	118	117
		104	103	98
		65	64	54
	SOM-IN	21	20	20
		32	30	26
		22	22	22
		40	40	40
		18	12	12
		20	20	20
		36	36	36
No rewards	PV-IN	144	141	136
		109	107	107
		104	101	101
Non-paired rewards	PV-IN	52	51	51
		59	55	51
		57	40	37
		47	47	46
		109	99	91
	VIP-IN	76	74	58
		62	59	59
		70	69	69
