# Supplementary figures and images for: Cell-type-specific responses to associative learning in the primary motor cortex
Source: eLife journal article supplement (doi:10.7554/elife.72549), 2022-02-03

**A**

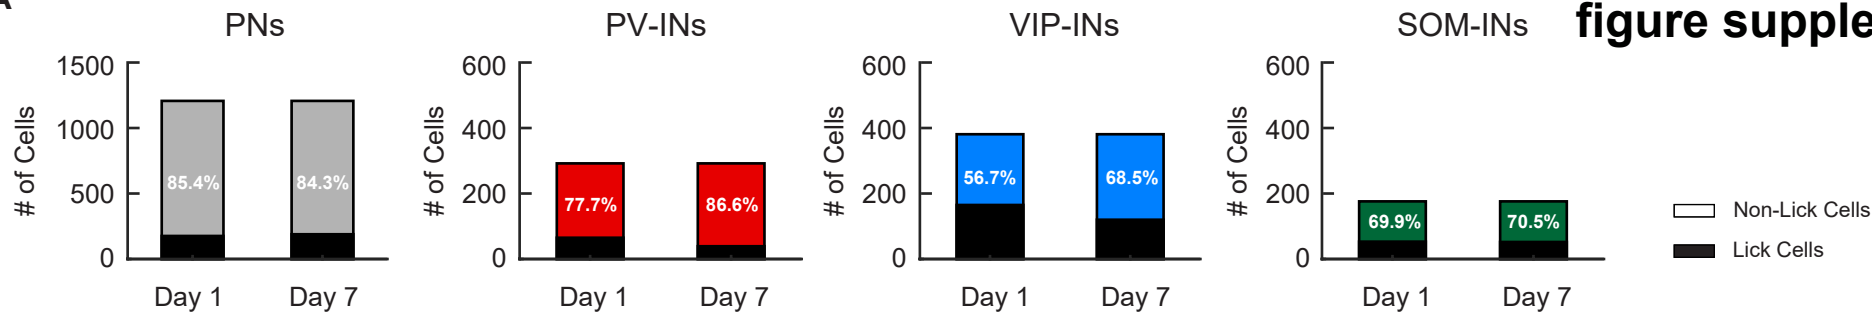

**B**

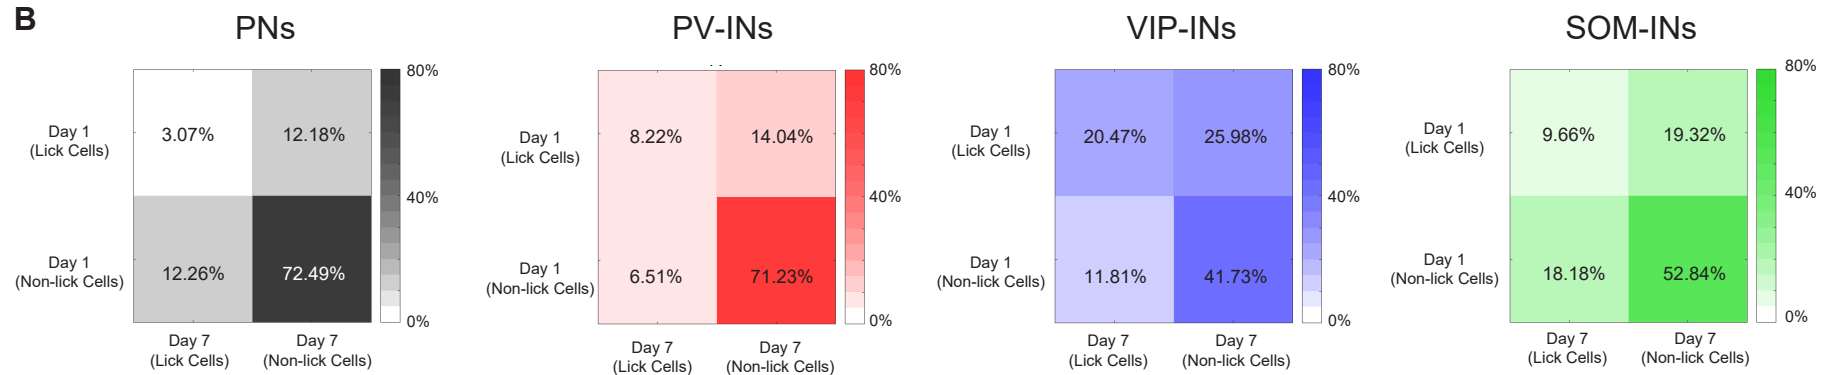

**C**

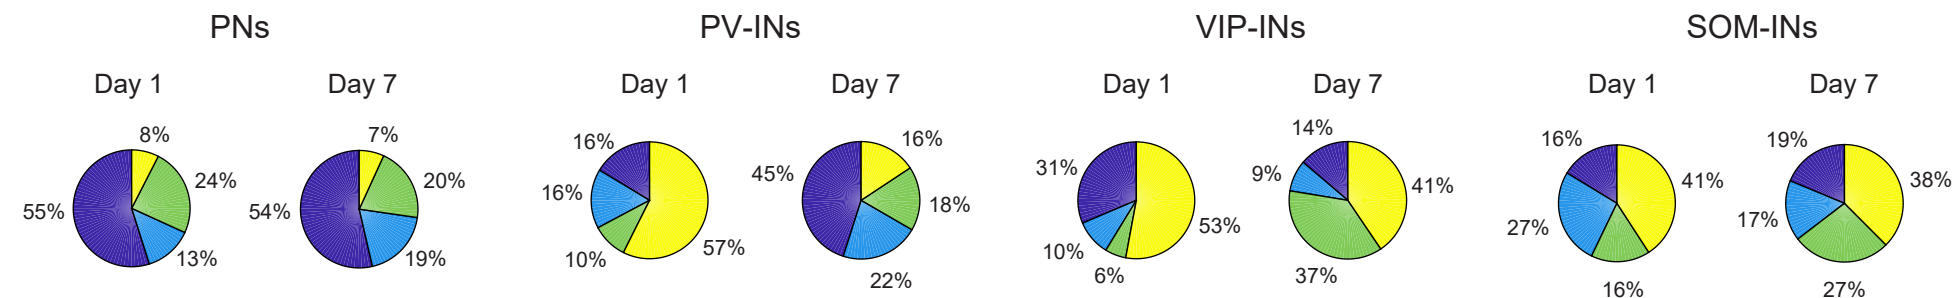

**D**

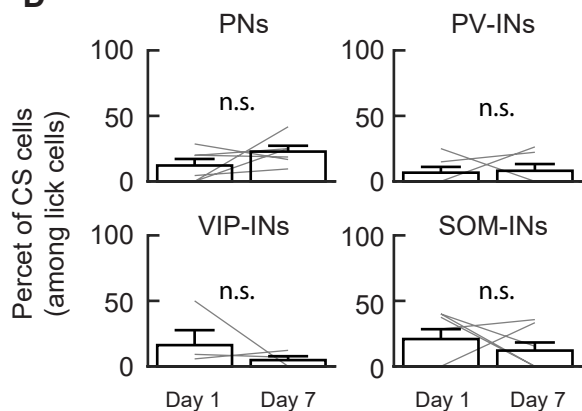

**E**

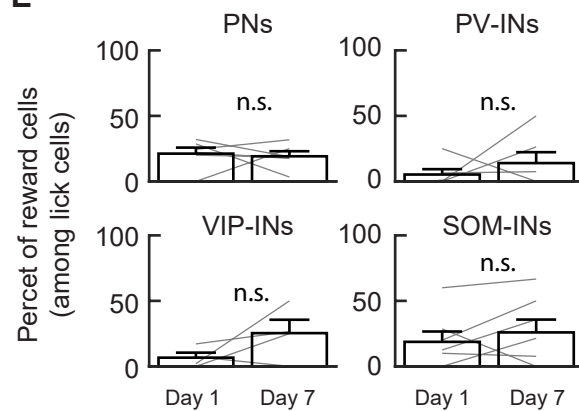

**F**

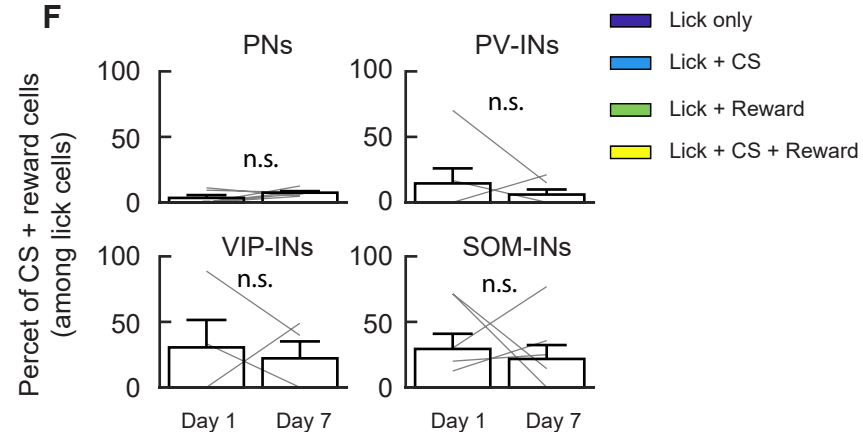

Supplement: supp [file elife-72549-supp-v1.zip]

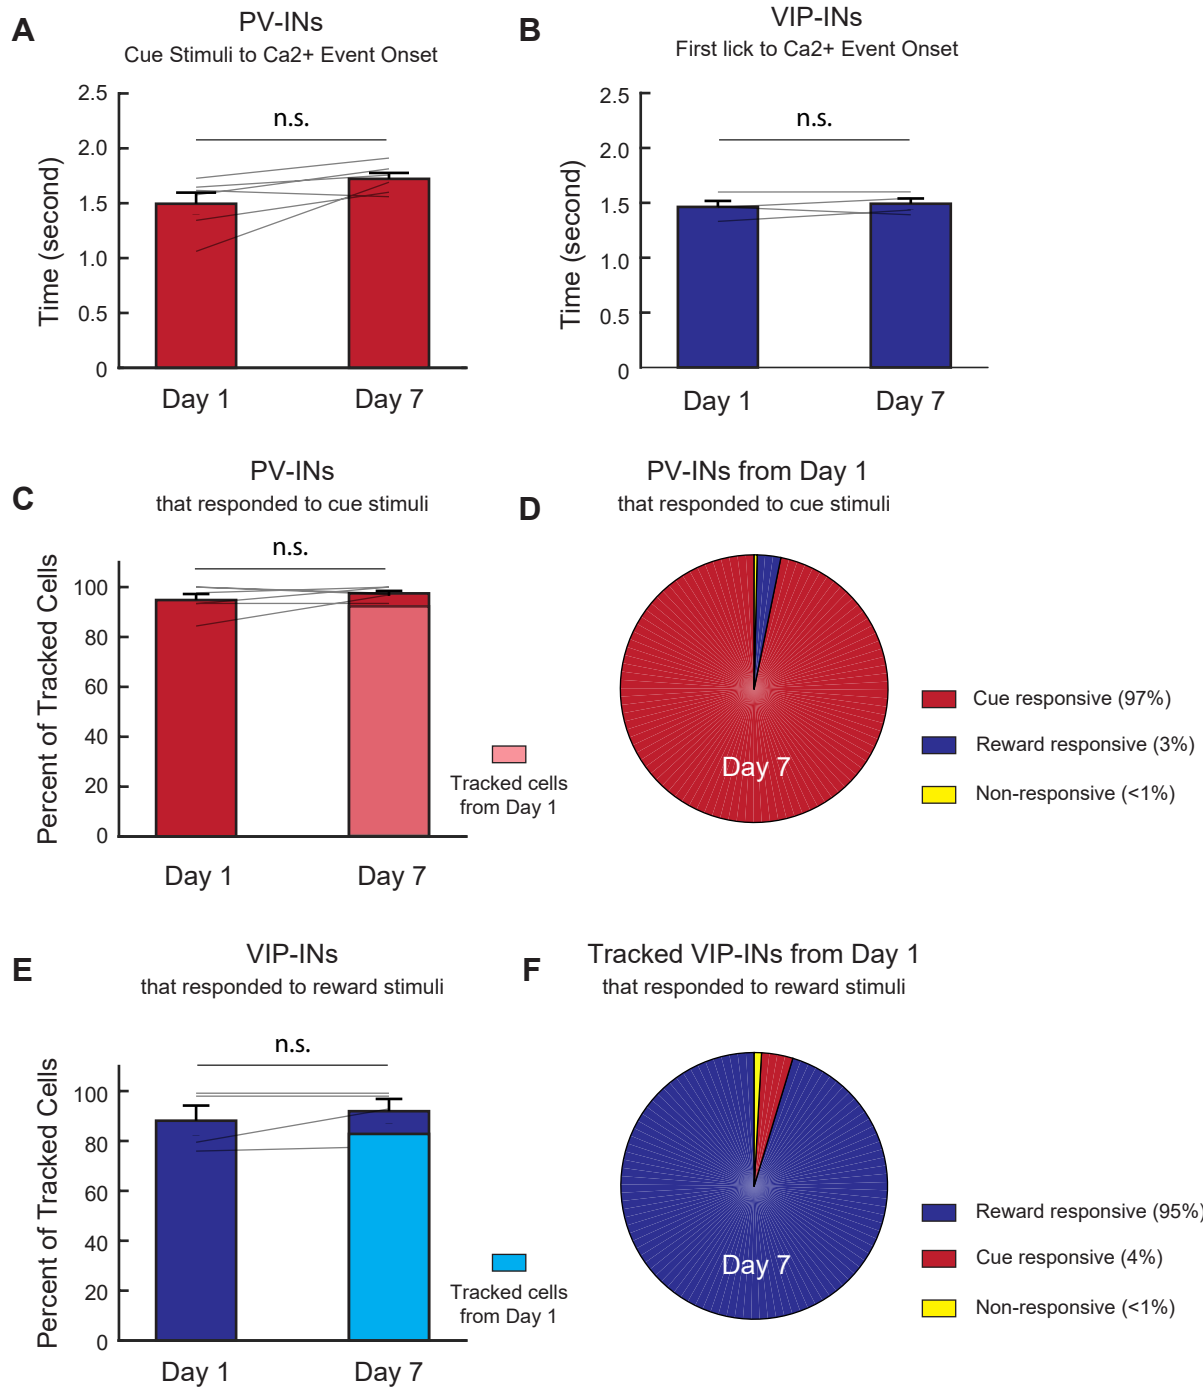

Supplement: supp [file elife-72549-supp-v1.zip]

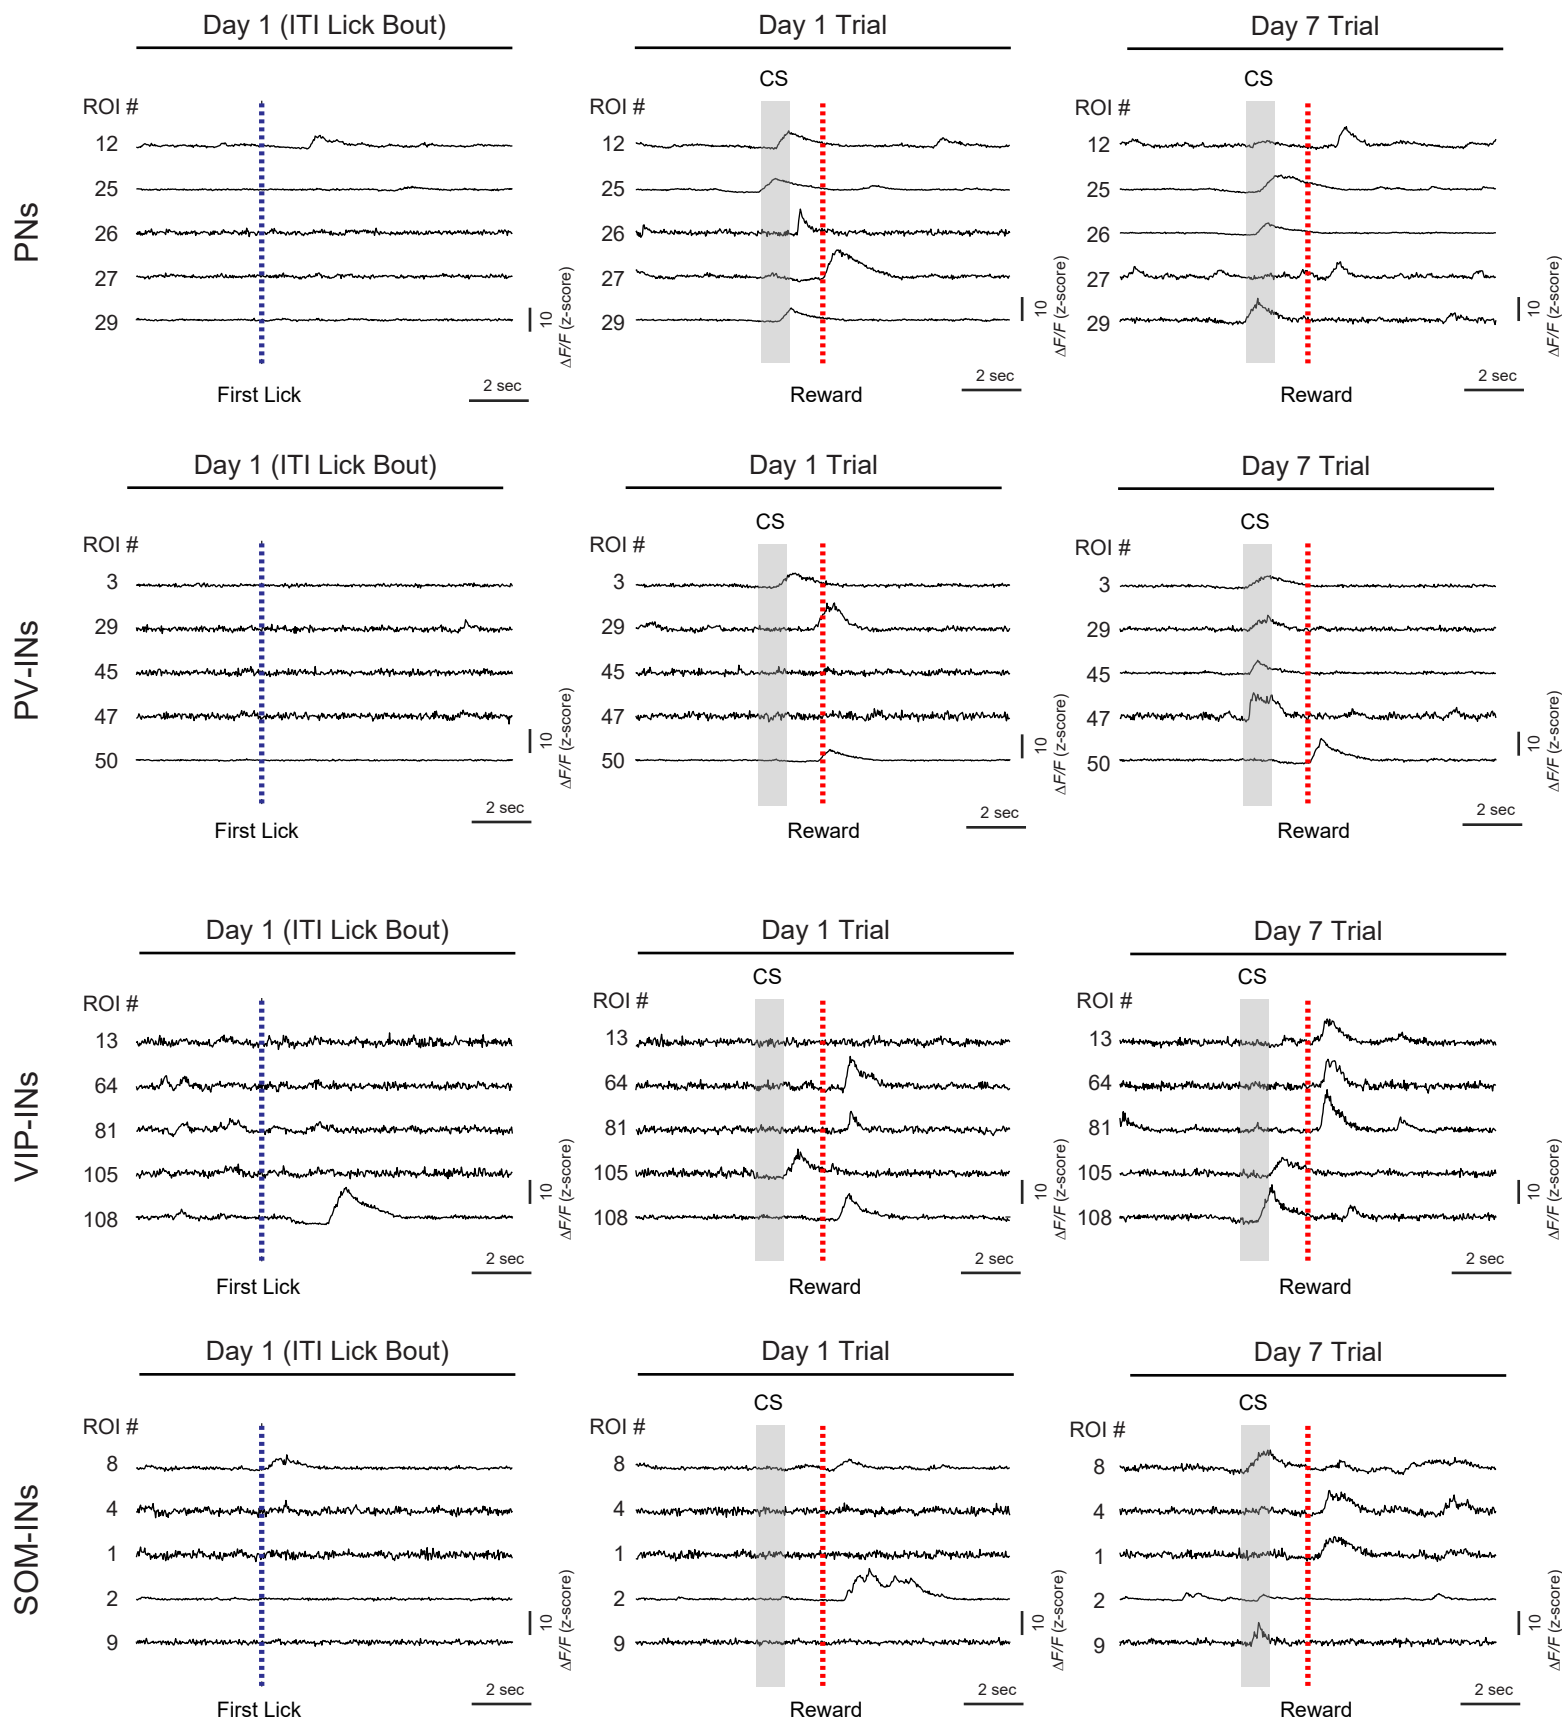

Lee et al., Figure 2 - figure supplement 1

Supplement: supp [file elife-72549-supp-v1.zip › elife_poa_e72549_Figure_2_figure_supplement_1.pdf]

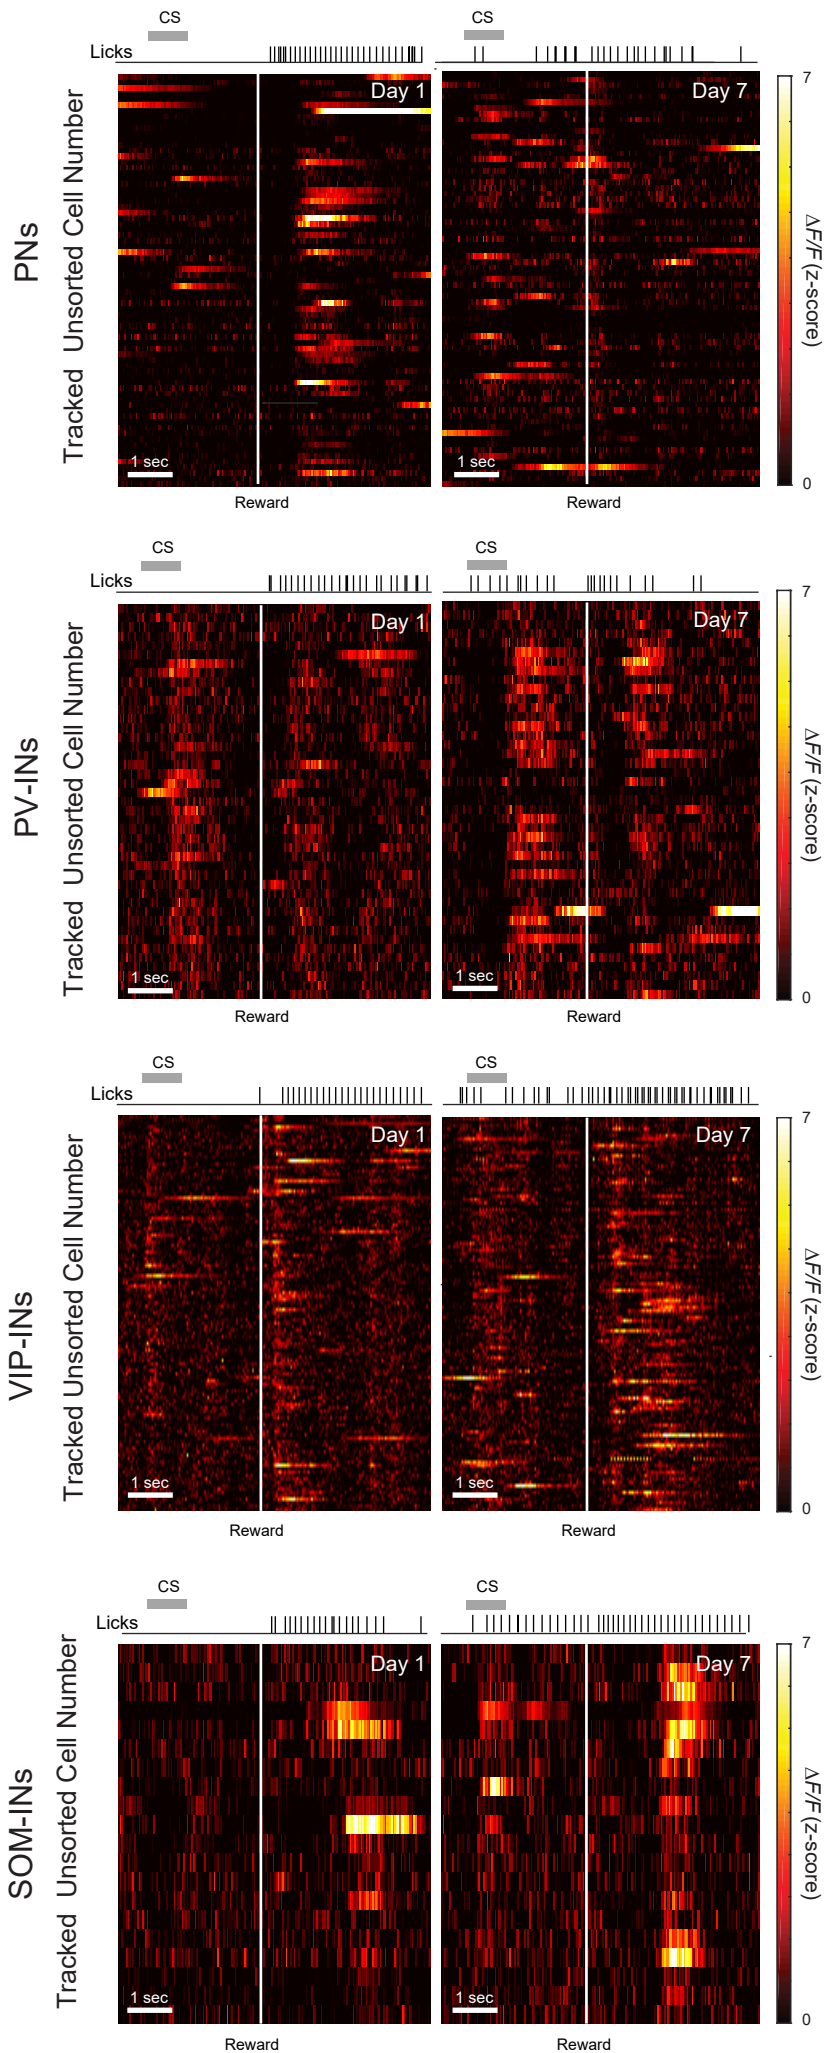

Lee et al., Figure 2  
- figure supplement 2

Supplement: supp [file elife-72549-supp-v1.zip › elife_poa_e72549_Figure_2_figure_supplement_2.pdf]

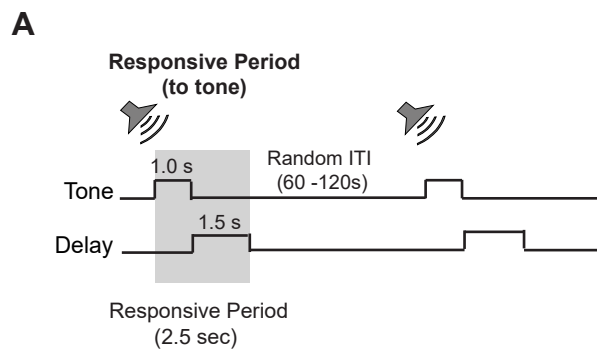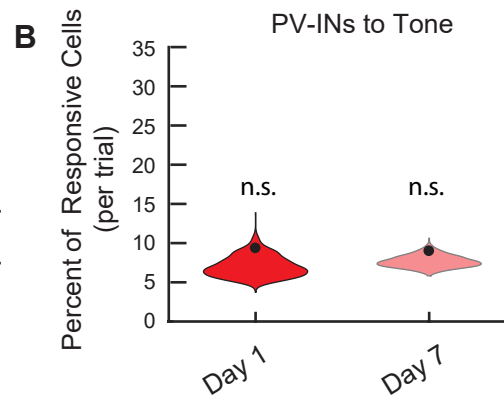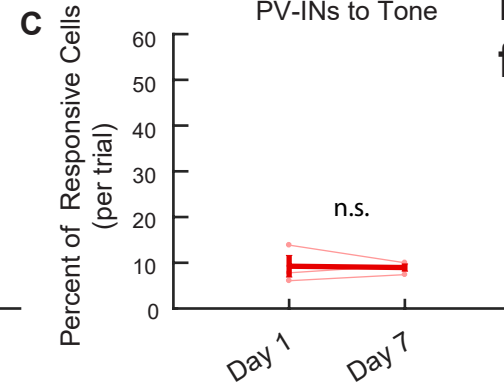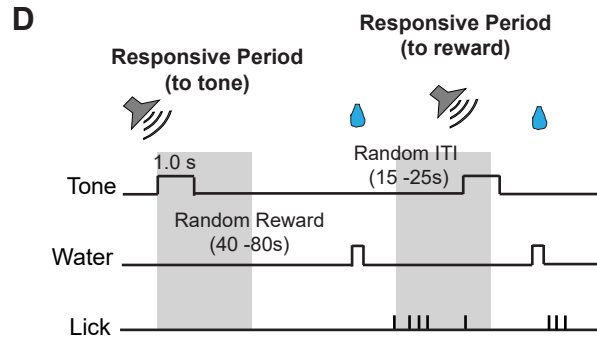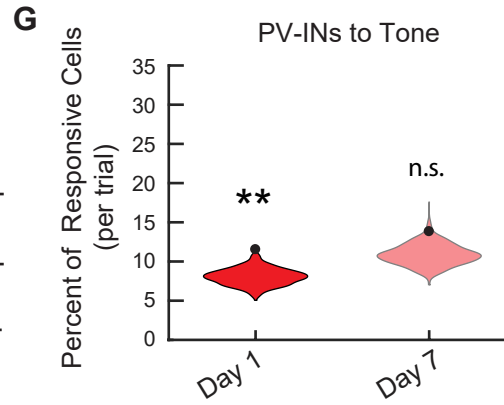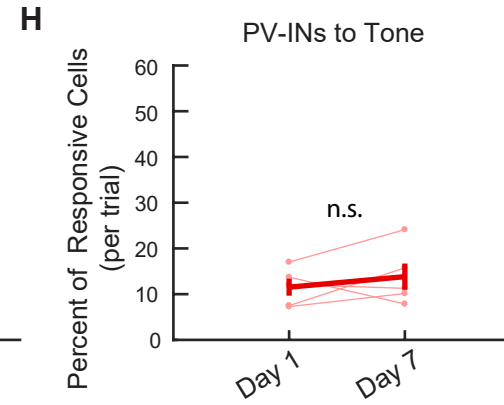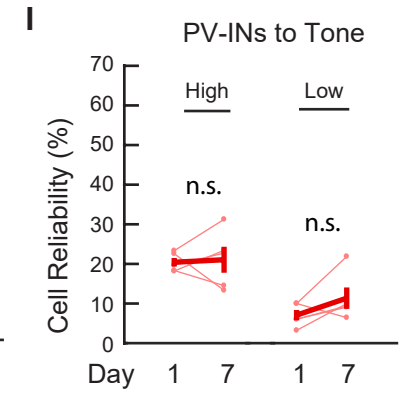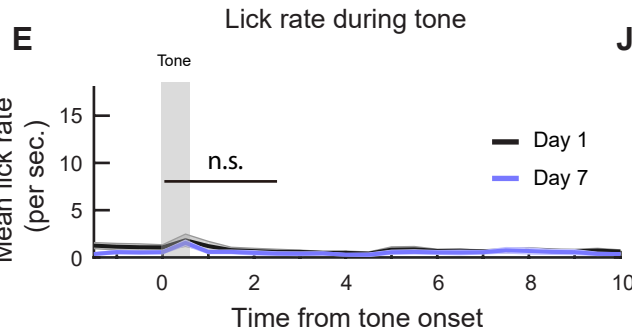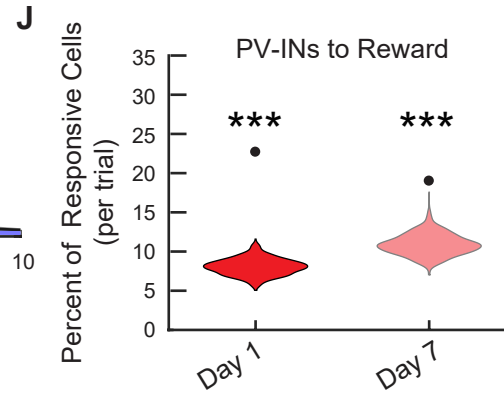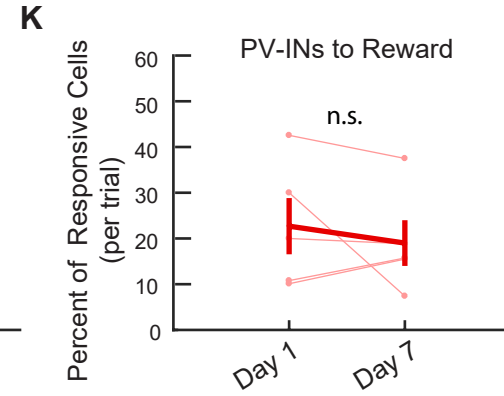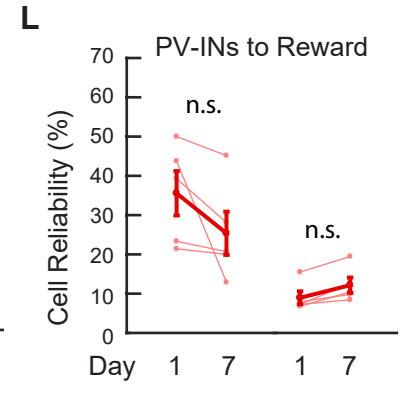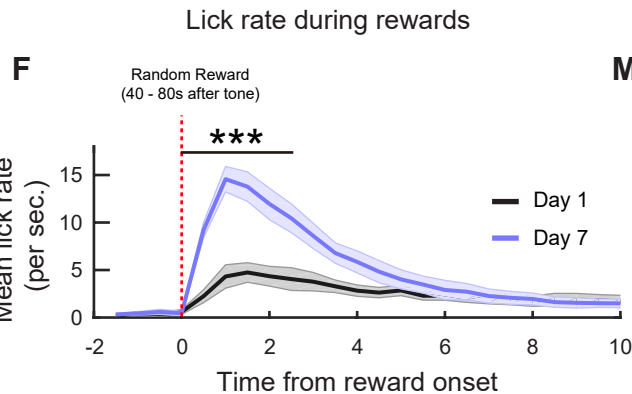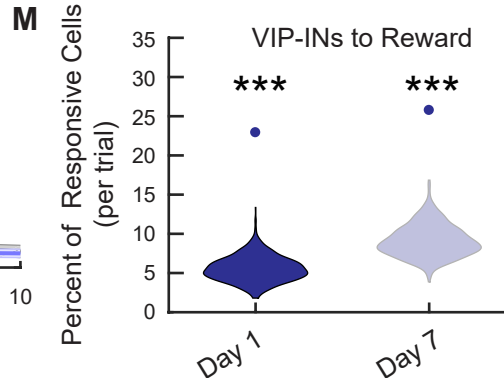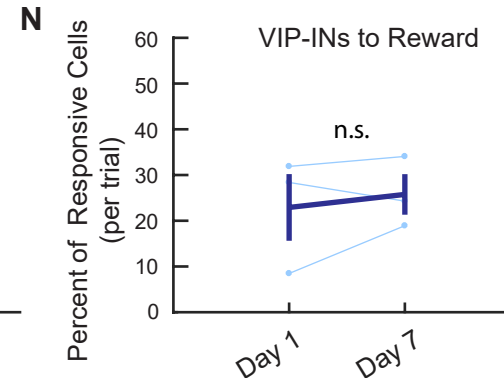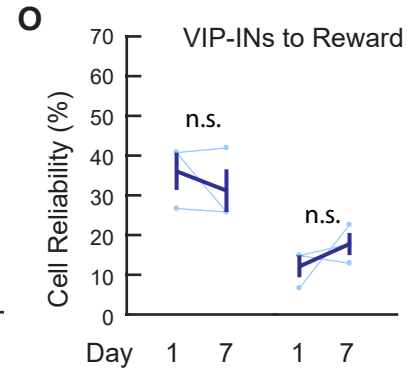

Supplement: supp [file elife-72549-supp-v1.zip › elife_poa_e72549_Figure_4_figure_supplement_2.pdf]
